# Supplementary material for: Method for Zero-Waste Circular Economy Using Worms for Plastic Agriculture: Augmenting Polystyrene Consumption and Plant Growth
Source: MDPI journal article supplement (doi:10.3390/mps4020043), 2021-06-21
Supplement: s1 [file s1]

## Supplementary Data

**Table S1.** Change in worm weight after four days with different additives.

Each set-up was performed in sextuplicate. Statistical analyses were performed using two-tailed Student's T-test. The average change in worm weight calculated in (g) and (%).

| Set-Up     | Initial Worm Weight (g) | Final Worm Weight (g) | Change in worm weight (g) | Average change in worm weight (g) | SEM    | Average Change in worm weight (%) | t-test P value (two-Tailed) |      |
|------------|-------------------------|-----------------------|---------------------------|-----------------------------------|--------|-----------------------------------|-----------------------------|------|
| Superworms | Control                 | 6.95                  | 7.19                      | 0.24                              | <−0.01 | 0.08                              | −0.04                       | 0.97 |
|            |                         | 7.42                  | 7.46                      | 0.04                              |        |                                   |                             |      |
|            |                         | 7.46                  | 7.55                      | 0.09                              |        |                                   |                             |      |
|            |                         | 10.40                 | 10.38                     | −0.02                             |        |                                   |                             |      |
|            |                         | 10.70                 | 10.67                     | −0.03                             |        |                                   |                             |      |
|            |                         | 10.33                 | 9.99                      | −0.34                             |        |                                   |                             |      |
|            | Cinnamon                | 6.98                  | 6.93                      | −0.05                             | −0.11  | 0.09                              | −1.24                       | 0.27 |
|            |                         | 7.08                  | 7.11                      | 0.03                              |        |                                   |                             |      |
|            |                         | 6.77                  | 6.97                      | 0.20                              |        |                                   |                             |      |
|            |                         | 10.66                 | 10.48                     | −0.18                             |        |                                   |                             |      |
|            |                         | 10.40                 | 10.14                     | −0.26                             |        |                                   |                             |      |
|            |                         | 10.33                 | 9.94                      | −0.39                             |        |                                   |                             |      |
|            | Sucrose                 | 7.01                  | 7.30                      | 0.29                              | 0.16   | 0.07                              | 1.79                        | 0.06 |
|            |                         | 7.40                  | 7.73                      | 0.33                              |        |                                   |                             |      |
|            |                         | 6.62                  | 6.90                      | 0.28                              |        |                                   |                             |      |
|            |                         | 10.55                 | 10.53                     | −0.02                             |        |                                   |                             |      |
|            |                         | 10.31                 | 10.36                     | 0.05                              |        |                                   |                             |      |
|            |                         | 10.71                 | 10.72                     | 0.01                              |        |                                   |                             |      |
|            | Bran                    | 6.57                  | 6.67                      | 0.10                              | −0.06  | 0.08                              | −0.69                       | 0.50 |
|            |                         | 7.26                  | 7.13                      | −0.13                             |        |                                   |                             |      |
|            |                         | 7.05                  | 7.30                      | 0.25                              |        |                                   |                             |      |
|            |                         | 10.10                 | 9.99                      | −0.11                             |        |                                   |                             |      |

|                  |                 |       |       |       |       |      |       |      |
|------------------|-----------------|-------|-------|-------|-------|------|-------|------|
|                  |                 | 10.48 | 10.15 | −0.33 |       |      |       |      |
|                  |                 | 10.39 | 10.25 | −0.14 |       |      |       |      |
| <b>Mealworms</b> | <b>Control</b>  | 6.79  | 6.36  | −0.43 |       |      |       |      |
|                  |                 | 6.29  | 5.37  | −0.92 |       |      |       |      |
|                  |                 | 6.44  | 5.65  | −0.79 |       |      |       |      |
|                  |                 | 10.49 | 10.58 | 0.09  | −0.24 | 0.22 | −2.85 | 0.32 |
|                  |                 | 10.46 | 10.70 | 0.24  |       |      |       |      |
|                  |                 | 10.76 | 11.11 | 0.35  |       |      |       |      |
|                  | <b>Cinnamon</b> | 6.22  | 5.74  | −0.48 |       |      |       |      |
|                  |                 | 6.23  | 5.89  | −0.34 |       |      |       |      |
|                  |                 | 6.45  | 5.89  | −0.56 |       |      |       |      |
|                  |                 | 10.54 | 10.63 | 0.09  | −0.20 | 0.16 | −2.36 | 0.27 |
|                  |                 | 10.44 | 10.90 | 0.46  |       |      |       |      |
|                  |                 | 10.45 | 10.09 | −0.36 |       |      |       |      |
|                  | <b>Sucrose</b>  | 6.36  | 5.57  | −0.79 |       |      |       |      |
|                  |                 | 6.45  | 4.77  | −1.68 |       |      |       |      |
|                  |                 | 6.34  | 5.87  | −0.47 |       |      |       |      |
|                  |                 | 10.56 | 10.34 | −0.22 | −0.46 | 0.29 | −5.43 | 0.18 |
|                  |                 | 10.59 | 10.71 | 0.12  |       |      |       |      |
|                  |                 | 10.52 | 10.80 | 0.28  |       |      |       |      |
|                  | <b>Bran</b>     | 6.40  | 5.84  | −0.56 |       |      |       |      |
|                  |                 | 6.11  | 5.76  | −0.35 |       |      |       |      |
|                  |                 | 6.59  | 6.20  | −0.39 |       |      |       |      |
|                  |                 | 10.69 | 10.84 | 0.15  | −0.17 | 0.12 | −1.98 | 0.23 |
|                  |                 | 10.75 | 10.89 | 0.14  |       |      |       |      |
|                  |                 | 10.50 | 10.50 | 0.00  |       |      |       |      |

**Table S2.** Effect of different media on mean change in height of the cacti.

Statistical analyses were performed using two-tailed T-tests. \*P < 0.05.

| Plant Media                  | Initial Height (cm) | Final Height (cm) | Change in Height |           |      |                 | Two-Sample Unequal Variance T-test |                 |
|------------------------------|---------------------|-------------------|------------------|-----------|------|-----------------|------------------------------------|-----------------|
|                              |                     |                   | Individual (cm)  | Mean (cm) | SEM  | Sig. (2-tailed) | Comparison Group                   | Sig. (2-tailed) |
| Tea Leaves                   | 9.4                 | 9.5               | 0.1              | 0.14      | 0.18 | 0.83            | Superworm Frass                    | 0.36            |
|                              | 13.0                | 13.5              | 0.5              |           |      |                 |                                    |                 |
|                              | 10.4                | 10.6              | 0.2              |           |      |                 |                                    |                 |
|                              | 7.9                 | 6.7               | 0.8              |           |      |                 |                                    |                 |
|                              | 12.6                | 11.6              | -1.0             |           |      |                 |                                    |                 |
|                              | 15.8                | 15.5              | -0.3             |           |      |                 | Mealworm Frass                     | 0.03*           |
|                              | 10.0                | 10.0              | 0.0              |           |      |                 |                                    |                 |
|                              | 10.9                | 10.6              | -0.3             |           |      |                 |                                    |                 |
|                              | 8.2                 | 8.0               | -0.2             |           |      |                 |                                    |                 |
|                              | 9.0                 | 10.1              | 1.1              |           |      |                 |                                    |                 |
|                              | 20.1                | 20.7              | 0.6              |           |      |                 |                                    |                 |
| Superworm frass <sup>1</sup> | 10.4                | 12.5              | 2.1              | 0.50      | 0.33 | 0.18            | Mealworm Frass                     | 0.02*           |
|                              | 11.2                | 13.0              | 1.8              |           |      |                 |                                    |                 |
|                              | 12.3                | 13.0              | 0.7              |           |      |                 |                                    |                 |
|                              | 7.6                 | 7.7               | 0.1              |           |      |                 |                                    |                 |
|                              | 9.1                 | 10.5              | 1.4              |           |      |                 |                                    |                 |
|                              | 11.0                | 9.4               | -1.6             |           |      |                 |                                    |                 |
|                              | 18.1                | 18.7              | 0.6              |           |      |                 |                                    |                 |
|                              | 10.8                | 10.8              | 0.0              |           |      |                 |                                    |                 |
|                              | 8.2                 | 7.9               | -0.3             |           |      |                 |                                    |                 |
|                              | 7.3                 | 7.5               | 0.2              |           |      |                 |                                    |                 |
|                              | 5.9                 | Dead              |                  |           |      |                 |                                    |                 |
| Mealworm frass               | 26.9                | 25.0              | -1.9             | -0.53     | 0.23 | 0.04*           | -                                  | -               |
|                              | 20.9                | 19.1              | -1.8             |           |      |                 |                                    |                 |
|                              | 13.1                | 13.9              | 0.8              |           |      |                 |                                    |                 |

|      |      |      |
|------|------|------|
| 13.0 | 12.8 | -0.2 |
| 13.6 | 13.5 | -0.1 |
| 8.1  | 7.6  | -0.5 |
| 7.5  | 7.3  | -0.2 |
| 6.1  | 5.4  | -0.7 |
| 7.7  | 7.1  | -0.6 |
| 9.9  | 9.6  | -0.3 |
| 11.9 | 11.6 | -0.3 |
| 8.1  | 7.6  | -0.5 |

<sup>1</sup> One out of eleven cacti replicates grown on superworm frass died

**Table S3.** List of individual chemicals from a mass search of the peaks detected in GC-MS.

|                                | PK | RT (mins) | Library search results                                                        |
|--------------------------------|----|-----------|-------------------------------------------------------------------------------|
| PS Balls                       | 1  | 4.63      | Benzene, ethyl                                                                |
|                                | 3  | 5.07      | 1,3,5,7-Cyclooctatetraene                                                     |
|                                | 4  | 5.1       | 3-Hexene, (E)-                                                                |
|                                | 7  | 6.05      | Benzene, propyl-                                                              |
|                                | 9  | 25.95     | Vanadium, ( $\eta$ 7-cycloheptatrienylum)( $\eta$ 5-2,4-cyclopentadien-1-yl)- |
| Superworm fed with Polystyrene | 1  | 6.45      | Decane, 4-methyl-                                                             |
|                                | 2  | 6.99      | 3-Ethyl-3-methylheptane                                                       |
|                                | 3  | 7.07      | Decane, 3,7-dimethyl-                                                         |
|                                | 4  | 7.67      | Decane, 3,6-dimethyl-                                                         |
|                                | 5  | 9.19      | Pentadecane                                                                   |
|                                | 6  | 9.75      | Tritetracontane                                                               |
|                                | 7  | 10.03     | 2,4-Dimethyldodecane                                                          |
|                                | 8  | 10.19     | Undecane, 2,9-dimethyl-                                                       |
|                                | 9  | 10.26     | Dodecane, 2,6,11-trimethyl-                                                   |
|                                | 10 | 10.38     | Octane, 5-ethyl-2-methyl-                                                     |
|                                | 11 | 10.45     | Dodecane, 1-iodo-                                                             |
|                                | 12 | 10.56     | Hexadecane                                                                    |
|                                | 13 | 10.63     | Dichloroacetic acid, 6-ethyl-3-octyl ester                                    |
|                                | 14 | 10.74     | Hexane, 2,3,4-trimethyl-                                                      |
|                                | 15 | 10.89     | Dodecane, 2,6,11-trimethyl-                                                   |
|                                | 16 | 12.16     | Heneicosane                                                                   |
|                                | 17 | 12.65     | Hexadecane                                                                    |
|                                | 18 | 12.97     | Tetracosane                                                                   |
|                                | 19 | 13.01     | Hexadecane                                                                    |
|                                | 20 | 13.09     | Octacosane                                                                    |
|                                | 21 | 13.20     | Hexadecane                                                                    |
|                                | 22 | 13.30     | Phenol, 2,4-bis(1,1-dimethylethyl)-                                           |
|                                | 23 | 13.63     | Octacosane                                                                    |
|                                | 24 | 14.74     | Heneicosane                                                                   |
|                                | 25 | 15.59     | Tridecane, 5-propyl-                                                          |

|                                  |    |       |                                  |
|----------------------------------|----|-------|----------------------------------|
| Mealworm fed with<br>Polystyrene | 26 | 16.05 | Heneicosane                      |
|                                  | 27 | 16.72 | Hexadecanal                      |
|                                  | 28 | 17.83 | Heneicosane                      |
|                                  | 29 | 18.13 | Octacosane                       |
|                                  | 30 | 18.24 | Heptadecane, 9-octyl-            |
|                                  | 31 | 18.75 | Oxirane, hexadecyl-              |
|                                  | 32 | 19.85 | Octacosane                       |
|                                  | 33 | 20.22 | Octacosane                       |
|                                  | 34 | 21.75 | Heptacosane                      |
|                                  | 35 | 22.16 | Hexadecane, 2-methyl-            |
|                                  | 36 | 24.27 | Heptacosane                      |
|                                  | 1  | 6.99  | 3-Ethyl-3-methylheptane          |
|                                  | 2  | 7.67  | Undecane, 4,7-dimethyl-          |
|                                  | 3  | 8.70  | Octanoic Acid                    |
|                                  | 4  | 10.26 | Dodecane, 2,6,11-trimethyl-      |
|                                  | 5  | 10.89 | Dodecane, 2,6,11-trimethyl-      |
|                                  | 6  | 13.09 | Tridecane, 1-iodo-               |
|                                  | 7  | 13.63 | Pentadecane                      |
|                                  | 8  | 15.58 | Pentadecane                      |
|                                  | 9  | 16.05 | Octadecane                       |
|                                  | 10 | 17.83 | Heptacosane                      |
|                                  | 11 | 18.17 | n-Hexadecanoic acid              |
|                                  | 12 | 18.24 | Pentacosane                      |
|                                  | 13 | 18.32 | Octanoic acid, decyl ester       |
|                                  | 14 | 18.75 | Hexadecanal                      |
|                                  | 15 | 19.46 | Heneicosane                      |
|                                  | 16 | 19.83 | 9,12-Octadecadienoic acid (Z,Z)- |
|                                  | 17 | 19.86 | 9-Octadecenoic acid, (E)-        |
|                                  | 18 | 20.04 | Octadecanoic acid                |
|                                  | 19 | 20.16 | Cyclododecane                    |
|                                  | 20 | 21.23 | Hexadecane                       |
|                                  | 21 | 21.75 | Heptacosane                      |

|                         |    |       |                                             |
|-------------------------|----|-------|---------------------------------------------|
|                         | 22 | 23.33 | Pentadecane, 8-hexyl-                       |
| Superworm fed with bran | 1  | 6.99  | Decane, 2,3,7-trimethyl-                    |
|                         | 2  | 7.08  | Octane, 5-ethyl-2-methyl-                   |
|                         | 3  | 7.67  | Nonane, 2,6-dimethyl-                       |
|                         | 4  | 10.03 | Oxalic acid, 6-ethyloct-3-yl isohexyl ester |
|                         | 5  | 10.19 | Hexane, 3,3-dimethyl-                       |
|                         | 6  | 10.26 | Sulfurous acid, 2-ethylhexyl hexyl ester    |
|                         | 7  | 10.38 | Decane, 2,3,7-trimethyl-                    |
|                         | 8  | 10.46 | Tridecane                                   |
|                         | 9  | 10.63 | Decane, 1,1'-oxybis-                        |
|                         | 10 | 10.75 | Cyclopentane, propyl-                       |
|                         | 11 | 10.89 | Dodecane, 2,6,11-trimethyl-                 |
|                         | 12 | 12.16 | Heptadecane                                 |
|                         | 13 | 12.98 | Decane, 2,4,6-trimethyl-                    |
|                         | 14 | 13.01 | Hexadecane                                  |
|                         | 15 | 13.09 | Sulfurous acid, 2-ethylhexyl isohexyl ester |
|                         | 16 | 13.64 | Eicosane                                    |
|                         | 17 | 15.59 | Tridecane, 5-propyl-                        |
|                         | 18 | 16.06 | 2-Bromo dodecane                            |
|                         | 19 | 16.73 | Tetradecanal                                |
|                         | 20 | 17.83 | Heneicosane                                 |
|                         | 21 | 18.15 | n-Hexadecanoic acid                         |
|                         | 22 | 18.24 | Heneicosane                                 |
|                         | 23 | 18.76 | Oxirane, hexadecyl-                         |
|                         | 24 | 19.86 | Heptacosane                                 |
|                         | 25 | 20.22 | Heptadecane, 9-octyl-                       |
|                         | 26 | 21.76 | Tetratriacontane                            |
|                         | 27 | 22.16 | Tetratriacontane                            |
|                         | 28 | 24.28 | Heptacosane                                 |
| Mealworm fed with bran  | 1  | 6.99  | Dodecane                                    |
|                         | 2  | 8.66  | Octanoic Acid                               |
|                         | 3  | 10.27 | Sulfurous acid, 2-ethylhexyl hexyl ester    |

|                                               |    |       |                                                 |
|-----------------------------------------------|----|-------|-------------------------------------------------|
|                                               | 4  | 10.89 | Dodecane, 2,6,11-trimethyl-                     |
|                                               | 5  | 13.09 | Tridecane, 1-iodo-                              |
|                                               | 6  | 13.64 | Tridecane, 1-iodo-                              |
|                                               | 7  | 15.59 | Heneicosane                                     |
|                                               | 8  | 16.06 | Octacosane                                      |
|                                               | 9  | 17.83 | Heptacosane                                     |
|                                               | 10 | 18.16 | n-Hexadecanoic acid                             |
|                                               | 11 | 18.24 | Octacosane                                      |
|                                               | 12 | 18.32 | Octanoic acid, dodecyl ester                    |
|                                               | 13 | 19.82 | 9,12-Octadecadienoic acid (Z,Z)-                |
|                                               | 14 | 19.86 | 9-Octadecenoic acid, (E)-                       |
|                                               | 15 | 20.04 | Octadecanoic acid                               |
|                                               | 16 | 20.17 | Cyclododecane                                   |
|                                               | 17 | 21.24 | Eicosane                                        |
|                                               | 18 | 21.76 | Eicosane                                        |
|                                               | 19 | 23.35 | Eicosane, 10-methyl-                            |
| Frass from<br>mealworms fed on<br>polystyrene | 1  | 3.80  | 2,4-Dimethyl-1-heptene                          |
|                                               | 2  | 6.31  | Octane, 3,4,5,6-tetramethyl-                    |
|                                               | 3  | 6.44  | Octane, 3-ethyl-                                |
|                                               | 4  | 6.99  | 3-Ethyl-3-methylheptane                         |
|                                               | 5  | 7.08  | 2-Bromononane                                   |
|                                               | 6  | 7.33  | 4-Methyl-2-heptene                              |
|                                               | 7  | 7.39  | 1-Decene, 8-methyl-                             |
|                                               | 8  | 7.67  | Decane, 3,6-dimethyl-                           |
|                                               | 9  | 8.71  | 1,4-Dioxane-2,5-dione, 3,6-dimethyl-, (3S-cis)- |
|                                               | 10 | 9.19  | Decane, 2,4,6-trimethyl-                        |
|                                               | 11 | 9.75  | Tritetracontane                                 |
|                                               | 12 | 10.03 | Oxalic acid, bis(6-ethyloct-3-yl) ester         |
|                                               | 13 | 10.19 | Nonane, 3-methyl-5-propyl-                      |
|                                               | 14 | 10.26 | Dodecane, 2,6,11-trimethyl-                     |
|                                               | 15 | 10.38 | Octane, 2,4,6-trimethyl-                        |
|                                               | 16 | 10.45 | Dodecane, 4,6-dimethyl-                         |



|                                                |    |       |                                         |
|------------------------------------------------|----|-------|-----------------------------------------|
|                                                | 17 | 10.63 | Sulfurous acid, isohexyl 2-pentyl ester |
|                                                | 18 | 10.74 | 1-Hexene, 3,3-dimethyl-                 |
|                                                | 19 | 10.89 | Decane, 6-ethyl-2-methyl-               |
|                                                | 20 | 12.16 | Heneicosane                             |
|                                                | 21 | 12.65 | Hexadecane                              |
|                                                | 22 | 12.97 | Heptadecane                             |
|                                                | 23 | 13.01 | Heptadecane                             |
|                                                | 24 | 13.09 | Tridecane, 1-iodo-                      |
|                                                | 25 | 13.31 | Phenol, 2,4-bis(1,1-dimethylethyl)-     |
|                                                | 26 | 13.55 | 2-Bromotetradecane                      |
|                                                | 27 | 13.63 | Tridecane, 1-iodo-                      |
|                                                | 28 | 14.74 | Heneicosane                             |
|                                                | 29 | 15.59 | Heneicosane                             |
|                                                | 30 | 16.06 | Pentacosane                             |
|                                                | 31 | 16.72 | Hexadecanal                             |
|                                                | 32 | 17.83 | Eicosane, 2-methyl-                     |
|                                                | 33 | 18.13 | Nonahexacontanoic acid                  |
|                                                | 34 | 18.24 | Octadecane, 1-iodo-                     |
|                                                | 35 | 18.75 | Oxirane, heptadecyl-                    |
|                                                | 36 | 19.85 | Decane, 2,9-dimethyl-                   |
|                                                | 37 | 20.22 | Tetracosane                             |
|                                                | 38 | 21.75 | Heptacosane                             |
|                                                | 39 | 22.16 | Tetratriacontane                        |
|                                                | 40 | 22.95 | Benzonitrile, m-phenethyl-              |
|                                                | 41 | 23.34 | Pentacosane                             |
|                                                | 42 | 24.27 | Octacosane                              |
| Frass from<br>superworms fed on<br>polystyrene | 1  | 3.80  | 2,4-Dimethyl-1-heptene                  |
|                                                | 2  | 6.31  | Octane, 3,4,5,6-tetramethyl-            |
|                                                | 3  | 6.44  | Decane, 4-methyl-                       |
|                                                | 4  | 6.89  | Sulfurous acid, hexyl pentyl ester      |
|                                                | 5  | 6.99  | 3-Ethyl-3-methylheptane                 |
|                                                | 6  | 7.07  | Decane, 4-ethyl-                        |

|    |       |                                         |
|----|-------|-----------------------------------------|
| 7  | 7.33  | Nitric acid, nonyl ester                |
| 8  | 7.39  | Cyclopropane, 1-butyl-2-pentyl-, trans- |
| 9  | 7.67  | Decane, 3,6-dimethyl-                   |
| 10 | 9.19  | Tetradecane                             |
| 11 | 9.75  | Methoxyacetic acid, 2-tetradecyl ester  |
| 12 | 10.03 | Decane, 1-iodo-                         |
| 13 | 10.19 | Heptadecane                             |
| 14 | 10.26 | Dodecane, 2,6,11-trimethyl-             |
| 15 | 10.38 | Dodecane, 2,6,11-trimethyl-             |
| 16 | 10.45 | Dodecane                                |
| 17 | 10.56 | Tridecane, 1-iodo-                      |
| 18 | 10.63 | Sulfurous acid, isohexyl 2-pentyl ester |
| 19 | 10.74 | Cyanamide, dibutyl-                     |
| 20 | 10.89 | Dodecane, 2,6,11-trimethyl-             |
| 21 | 12.16 | Heptadecane                             |
| 22 | 12.65 | Hexadecane                              |
| 23 | 12.98 | Dodecane, 3-methyl-                     |
| 24 | 13.01 | Dodecane, 4,6-dimethyl-                 |
| 25 | 13.09 | Hexadecane                              |
| 26 | 13.31 | Phenol, 2,4-bis(1,1-dimethylethyl)-     |
| 27 | 13.55 | Decane, 3,6-dimethyl-                   |
| 28 | 13.63 | Octacosane                              |
| 29 | 14.74 | Heneicosane                             |
| 30 | 15.59 | Heneicosane                             |
| 31 | 16.06 | Pentadecane                             |
| 32 | 16.72 | Tetradecanal                            |
| 33 | 17.06 | Heneicosane                             |
| 34 | 17.83 | Octadecane, 1-iodo-                     |
| 35 | 18.13 | Methoxyacetic acid, 2-tridecyl ester    |
| 36 | 18.24 | Heneicosane                             |
| 37 | 18.75 | Oxirane, hexadecyl-                     |
| 38 | 19.85 | Octadecane                              |

|    |       |                     |
|----|-------|---------------------|
| 39 | 20.22 | Tetratriacontane    |
| 40 | 21.69 | Eicosane            |
| 41 | 21.76 | Octadecane, 1-iodo- |
| 42 | 22.16 | Eicosane            |
| 43 | 24.27 | Heptacosane         |

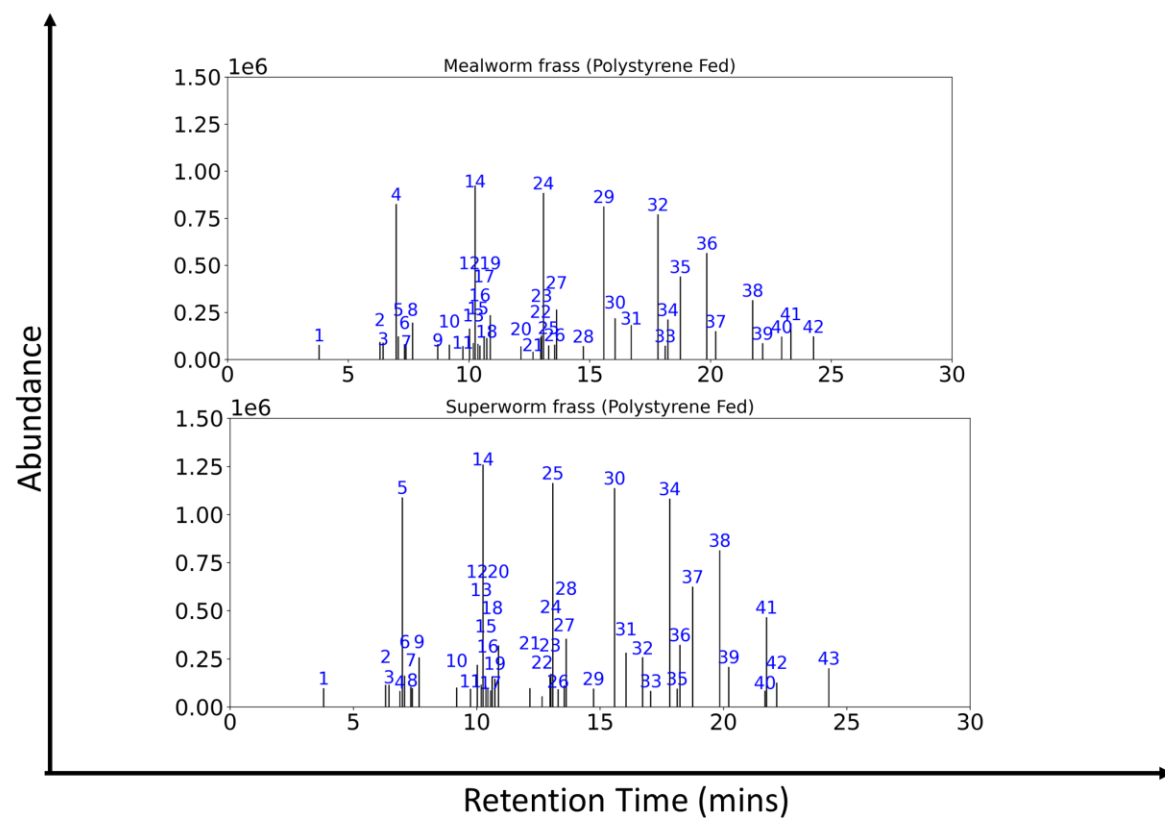

**Figure S1.** GCMS analysis of mealworm frass and superworm frass extracted from polystyrene fed worm
